# Supplementary material
Source: PubMed Central journal article supplement (PMC2746009)
Supplement: NIHMS101992-supplement-01.pdf [file NIHMS101992-supplement-01.pdf]

Type of file: figure

Label: Supplementary Figure

Filename: Supplementary Figure S1.doc

Supplementary Figure S1. Box-and-whisker plots for other covariates analyzed for DIF (see Figure 2)

a. Kame: Language of testing

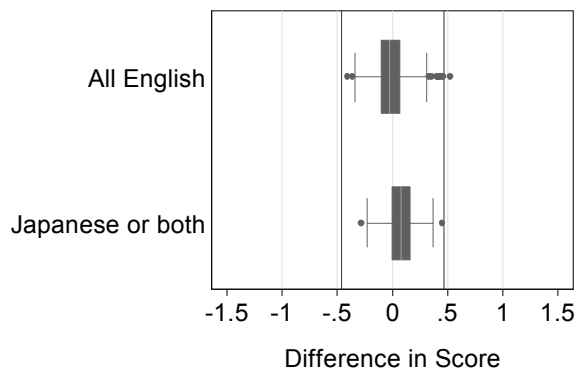

b. Kame: Read or write Japanese\*

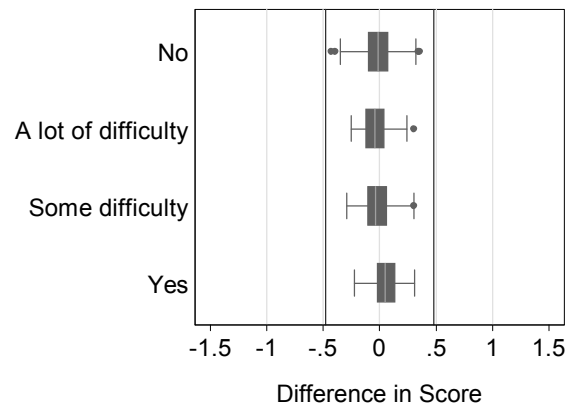

c. Kame: Age

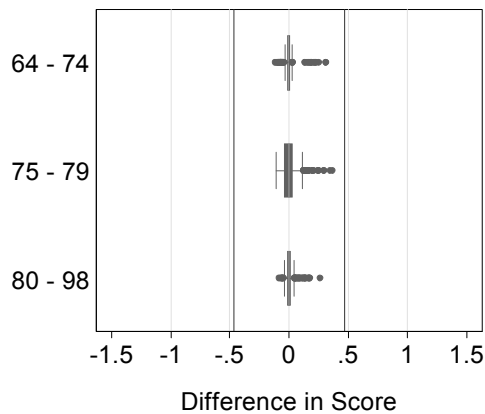

d. HAAS: Age

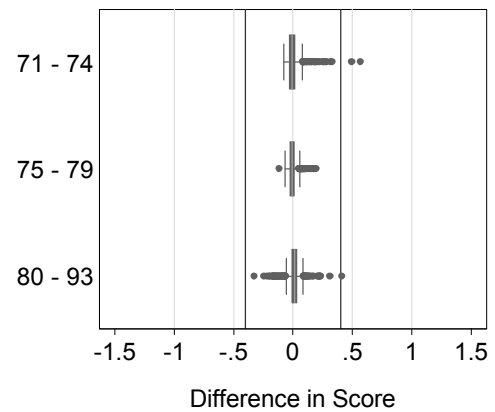

e. HAAS: Educational attainment

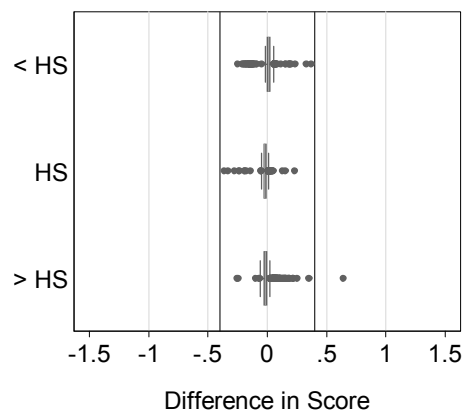

\*There was no DIF related to reading or writing Japanese in HAAS.

Type of file: table

Label: Supplementary Table

Filename: Supplementary Table S1.doc

Supplementary Table S1. Item-level findings of differential item functioning related to self-reported proficiency reading or writing Japanese (Kame and HAAS).\*

| Item                   | Kame              |         | HAAS        |         |
|------------------------|-------------------|---------|-------------|---------|
|                        | non-uniform       | uniform | non-uniform | uniform |
| Birth place            | -                 | -       | 0.453       | 6.8     |
| Year of birth          | -                 | -       | -           | -       |
| Date of birth          | -                 | -       | -           | -       |
| Age                    | 0.749             | -0.8    | 0.468       | -1.3    |
| Minutes in an hour     | -                 | -       | -           | -       |
| Direction of sunset    | 0.565             | 5.5     | 0.443       | 4.0     |
| Instant recall 1       | 0.075             | -5.2    | 0.820       | -9.7    |
| Instant recall 2       | -                 | -       | 0.397       | -2.7    |
| Digits backwards 1     | -                 | -       | 0.459       | -1.4    |
| Digits backwards 2     | 0.081             | 2.9     | 0.027       | 1.4     |
| Digits backwards 3     | 0.467             | 0.7     | 0.193       | 1.1     |
| Recall 1a              | 0.762             | 1.8     | 0.117       | 0.7     |
| Recall 1b              | <b>&lt; 0.001</b> | 1.5     | 0.043       | 1.1     |
| Recall 1c              | 0.039             | 0.4     | 0.119       | 1.0     |
| Serial 3 subtraction 1 | 0.923             | 5.7     | 0.457       | 7.3     |
| Serial 3 subtraction 2 | 0.757             | -0.4    | 0.367       | 1.1     |
| Serial 3 subtraction 3 | 0.115             | 3.3     | 0.393       | 2.4     |

|                            |                |              |       |      |
|----------------------------|----------------|--------------|-------|------|
| Year                       | -              | -            | -     | -    |
| Month                      | -              | -            | 0.581 | 2.8  |
| Date                       | 0.323          | -0.3         | 0.120 | 2.3  |
| Day of the week            | 0.907          | -5.6         | 0.022 | 1.3  |
| Season                     | -              | -            | 0.104 | 5.6  |
| Spatial orientation A      | -              | -            | 0.762 | 2.6  |
| Spatial orientation B      | -              | -            | 0.252 | -9.3 |
| Animal fluency             | 0.865          | -0.1         | 0.440 | -1.4 |
| Similes                    | < <b>0.001</b> | 0.0          | 0.097 | 0.0  |
| Judgment                   | < <b>0.001</b> | 2.5          | 0.982 | -0.5 |
| Repeat phrase 1            | 0.262          | <b>-10.1</b> | 0.003 | -7.8 |
| Repeat phrase 2            | 0.005          | -0.9         | 0.214 | -2.9 |
| Read / follow command      | 0.191          | -8.9         | 0.044 | -4.1 |
| Write a specific sentence  | 0.702          | -2.4         | 0.463 | -2.4 |
| Copy interlocked pentagons | 0.629          | 0.5          | 0.935 | 1.4  |
| Three step command         | 0.814          | 5.0          | 0.676 | -3.9 |
| Recall 2a                  | 0.874          | 0.2          | 0.683 | 0.5  |
| Recall 2b                  | 0.067          | -0.2         | 0.036 | 0.0  |
| Recall 2c                  | 0.314          | 0.4          | 0.038 | 0.7  |
| Name body parts            | 0.143          | 0.0          | 0.045 | -3.8 |
| Object naming 1            | -              | -            | -     | -    |
| Object naming 2            | -              | -            | 0.481 | 0.7  |
| Object recall              | 0.659          | 2.3          | 0.543 | -4.2 |

\* Non-uniform DIF is present (bold) if  $p < 0.002$ . Uniform DIF is present (bold) if the percent change in  $\beta_1$  is  $> 10$ .

- Indicates an item did not have enough discordance to analyze with these subgroups
